# Supplementary material for: Gel-like ionic complexes for antimicrobial, hemostatic and adhesive properties
Source: Royal Society of Chemistry journal article supplement (doi:10.1039/c8tb03367f), 2019-01-01
Supplement: c8tb03367f1.pdf [file c8tb03367f1.pdf]

**Supporting Information for Journal of Materials Chemistry B**

# Gel-Like Ionic Complexes for Antimicrobial, Hemostatic and Adhesive Properties

*Jhia-Sin Jhiang,<sup>‡, ±</sup> Tzu-Hsien Wu,<sup>†</sup> Chung-Jung Chou,<sup>‡, ±</sup> Yung Chang,<sup>\*, ‡, ±</sup> Chun-Jen Huang,<sup>‡, #, ±, \*</sup>*

<sup>†</sup> Department of Biomedical Sciences and Engineering, National Central University, Jhong-Li, Taoyuan 320, Taiwan

<sup>#</sup> Department of Chemical and Materials Engineering, National Central University, Jhong-Li, Taoyuan 320, Taiwan

<sup>‡</sup> R&D Center for Membrane Technology, Chung Yuan Christian University, 200 Chung Pei Rd., Chung-Li City 32023, Taiwan

<sup>±</sup> Department of Chemical Engineering, Chung Yuan Christian University, 200 Chung Pei Rd., Chung-Li City 32023, Taiwan

\* Corresponding authors: Email: [cjhuang@ncu.edu.tw](mailto:cjhuang@ncu.edu.tw) (C.-J.H.); [ychang@cycu.edu.tw](mailto:ychang@cycu.edu.tw) (Y. C.)

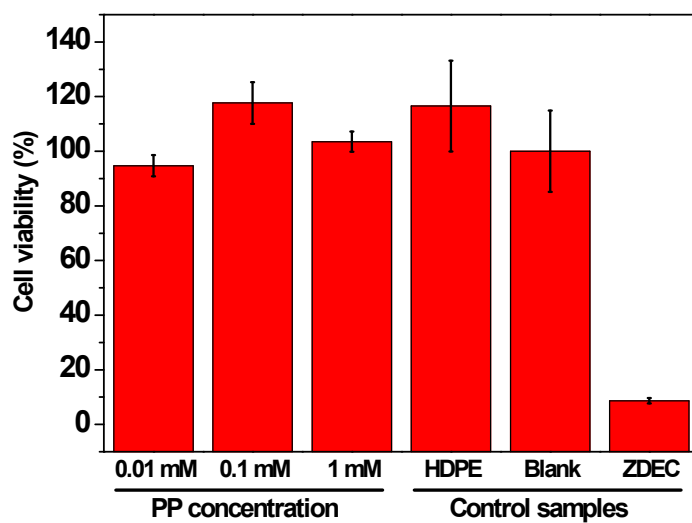

**Figure S1.** The XTT assay for PP in PBS at a concentration from 0.01 to 1 mM. HDPE, blank culture dish and ZDEC were used as control samples.
